# Supplementary material for: Rapamycin (mTORC1 inhibitor) reduces the production of lactate and 2-hydroxyglutarate oncometabolites in IDH1 mutant fibrosarcoma cells
Source: PubMed Central journal article supplement (PMC5457553; doi:10.1186/s13046-017-0544-y), 2017-06-02
Supplement: 13046_2017_544_MOESM2_ESM.pdf [file 13046_2017_544_MOESM2_ESM.pdf]

p-mTOR

p-S6

LDH-A

Gls

control

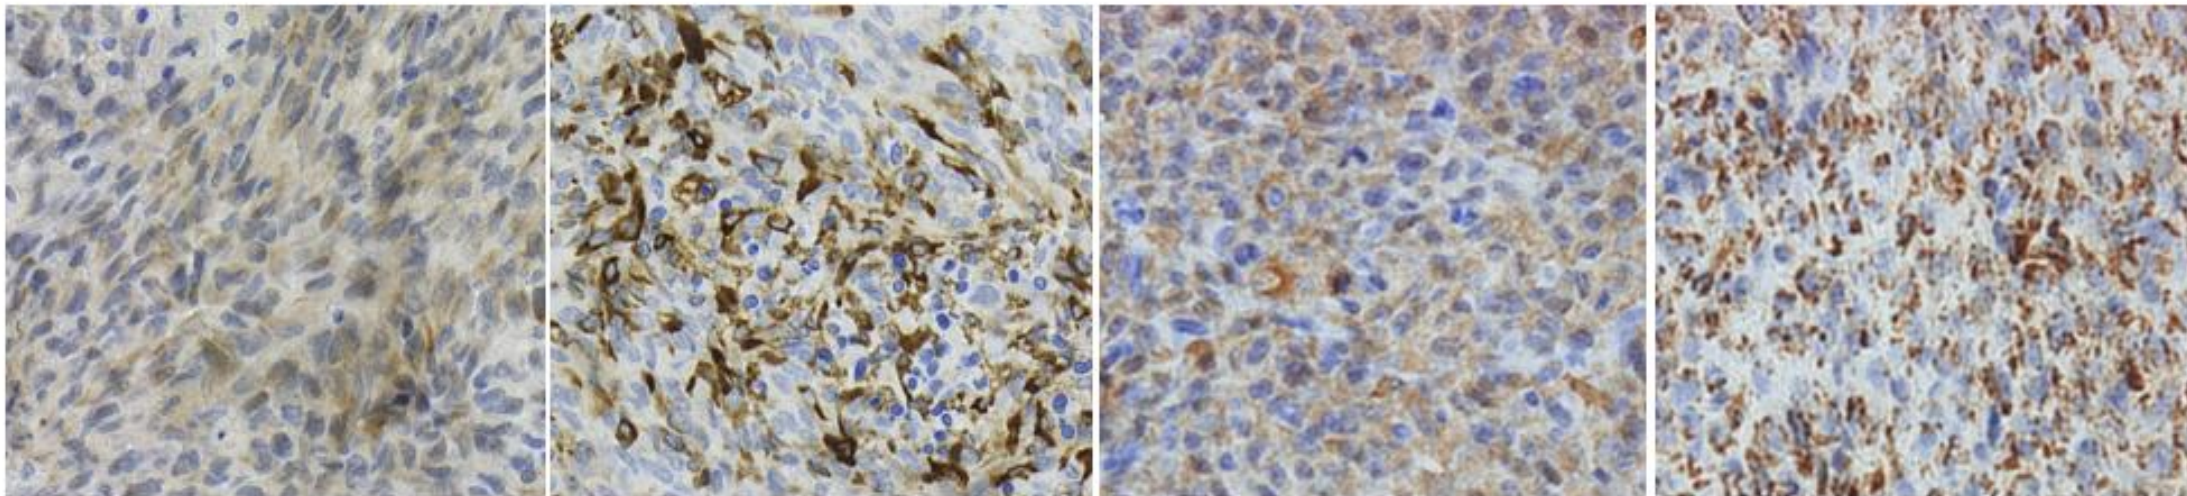

Rapamune

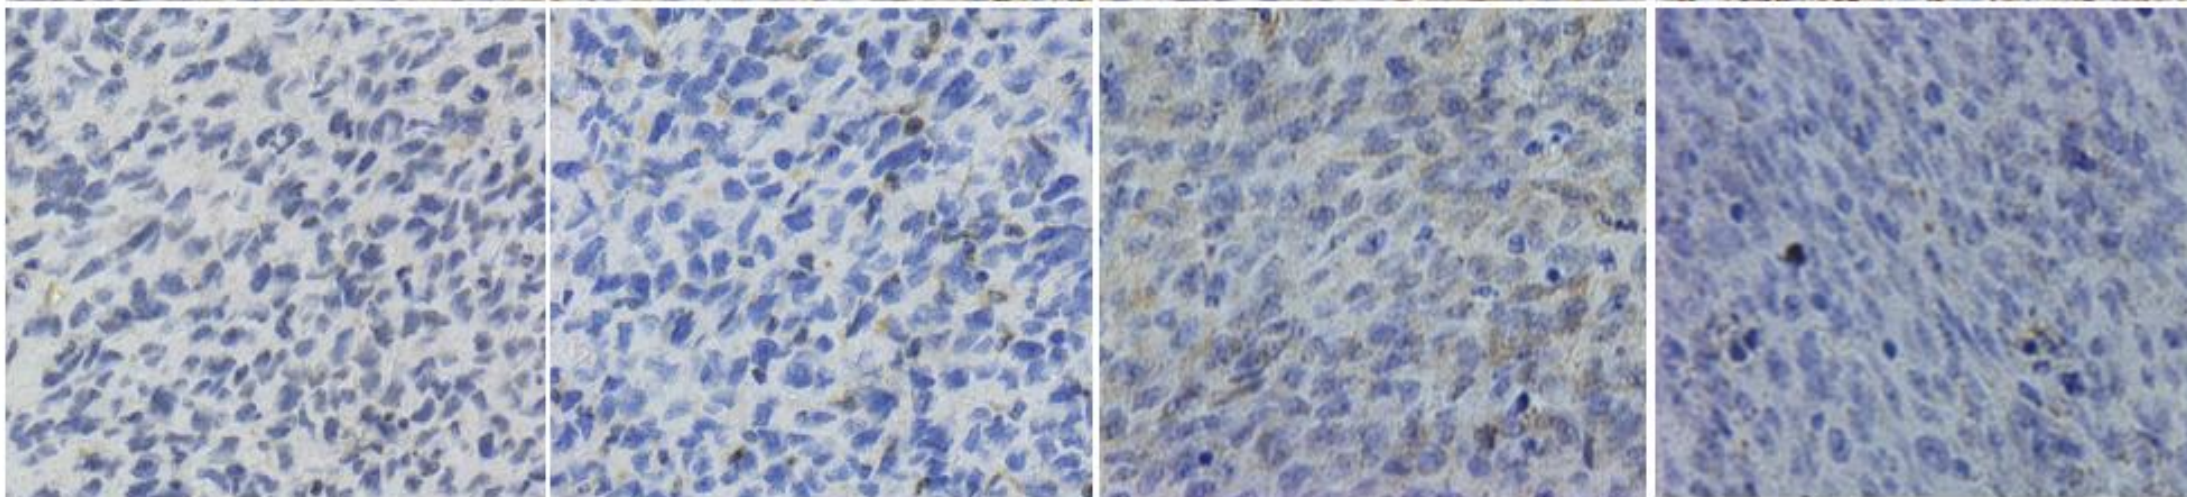

Suppl. Figure 1.
